# Supplementary material
Source: PubMed Central journal article supplement (PMC5767851)
Supplement: 10.1074_M117.807032_jbc.M117.807032-1.pdf [file 10.1074_M117.807032_jbc.M117.807032-1.pdf]

The analysis shows that the Cdr6 transporter is part of a separate group from well known drug transporters (Cdr1, Cdr2) of *C. albicans*. The phylogenetic tree was generated using MEGA 6 software. Values at nodes represent bootstrap values signifying confidence levels.

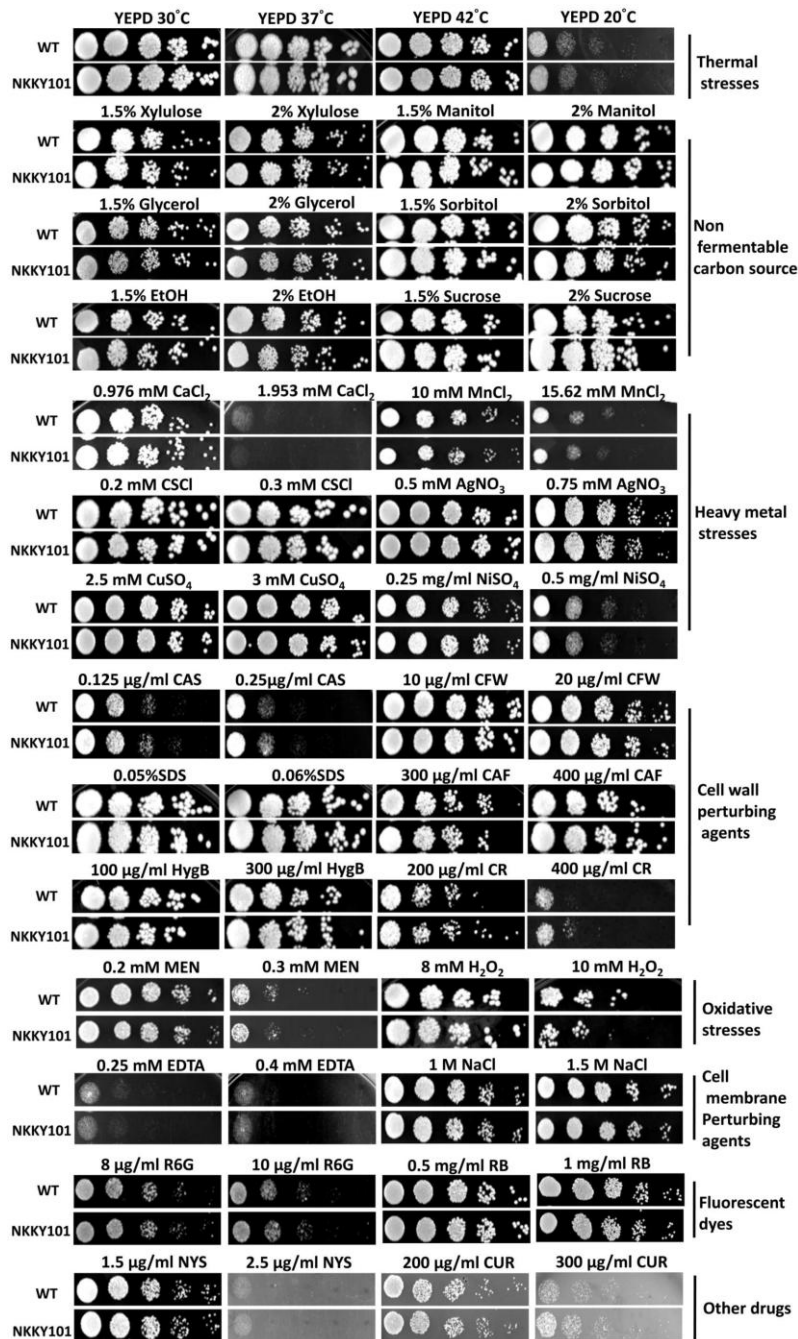

Fig. S2. Growth analysis of WT and NKKY101 strain in presence of different stresses.

A comparison of susceptibilities by spot dilution assays between WT and *CDR6* null strain NKKY101 under different indicated conditions by spotting 5  $\mu$ l of 5-fold serial dilutions of each strain.

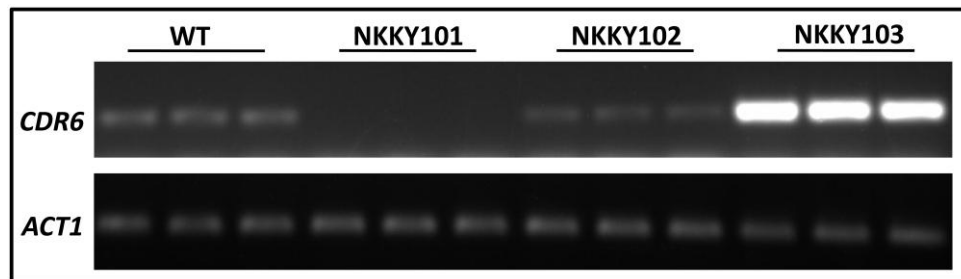

**Fig. S3. Confirmation of *C. albicans* strains.**

Confirmation of WT, *CDR6* null mutant NKKY101, *CDR6* revertant NKKY102 and *CDR6* over expression NKKY103 strains by checking the expression of the *CDR6* transcript using semi quantitative RT-PCR. *ACT1* was used as a control.

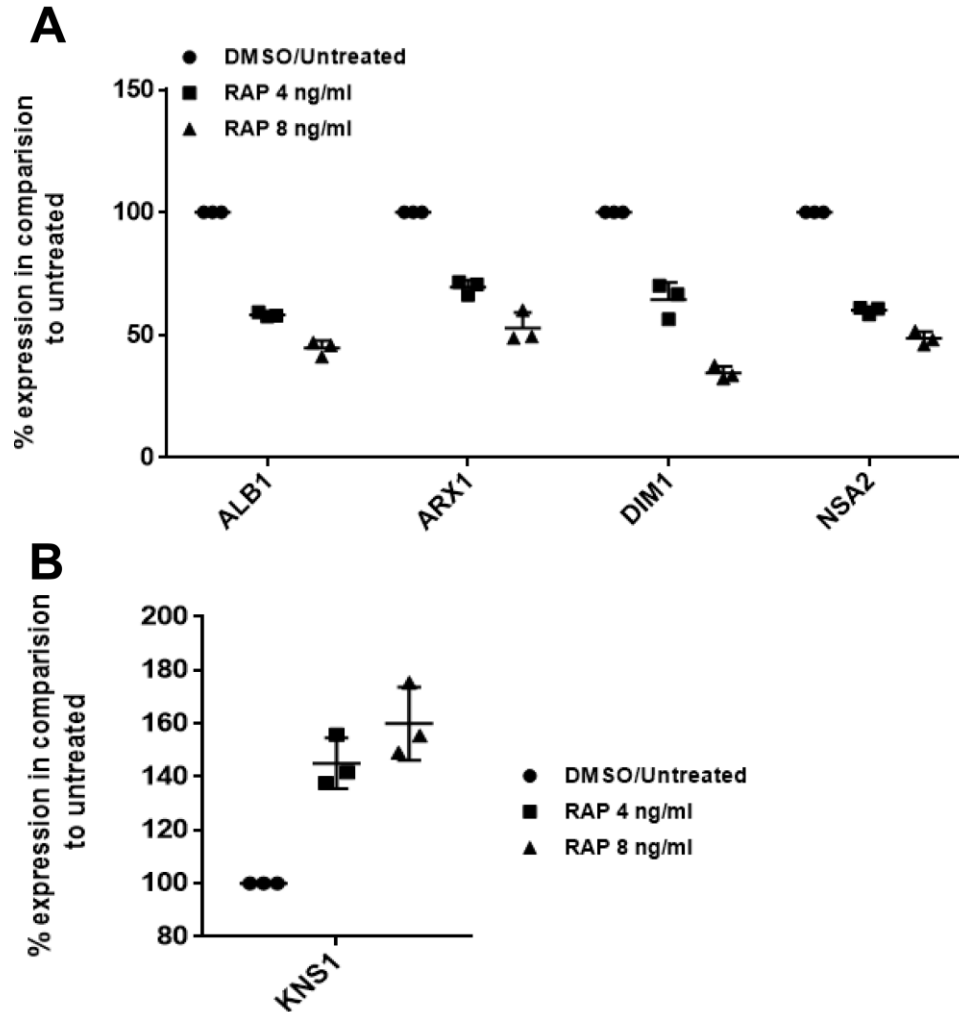

**Fig. S4. Analysis of molecular inhibition of Tor1 by rapamycin in NKKY101 strain on ribosome biogenesis genes expressions.** *CDR6/ROA1* null strain NKKY101 treated with rapamycin concentration of 4ng/ml and 8ng/ml for 1hr and (A) quantification of some randomly selected ribosome biogenesis genes expression by qRT-PCR in rapamycin treated NKKY101 mutant in comparison to untreated sample. (B) Quantification of *KNS1* expression by qRT-PCR in rapamycin treated NKKY101 mutant in comparison to untreated sample. Data (mean  $\pm$  SD) were normalized to an internal *ACT1* mRNA control and represent as percentage expression in comparison to untreated.

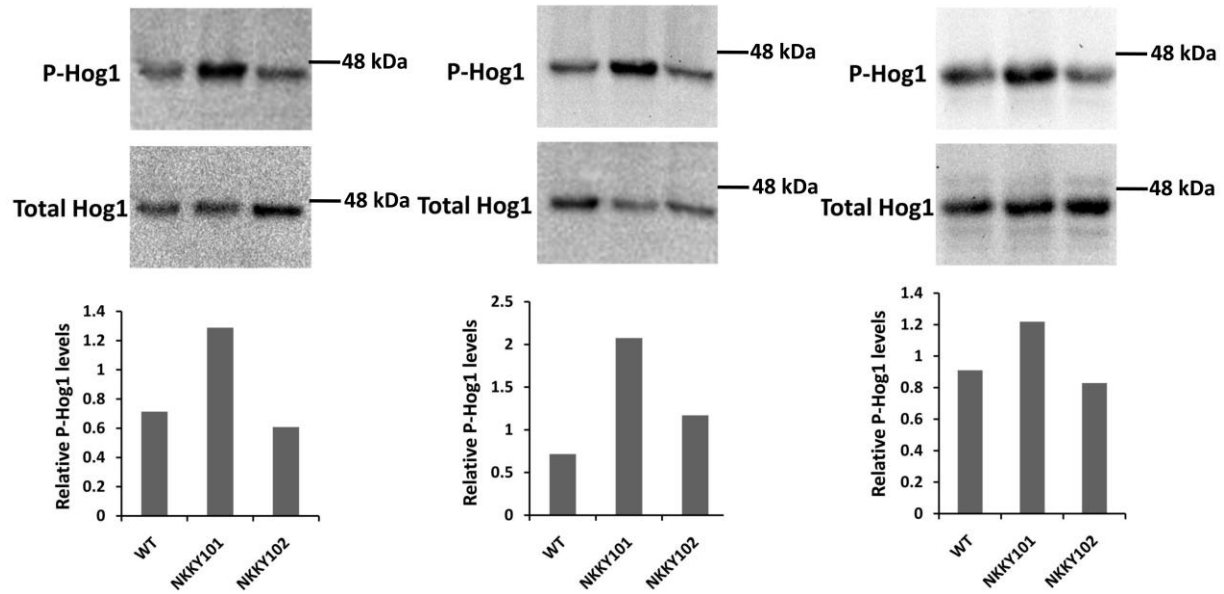

**Fig. S5. Hog1 phosphorylation level in WT, NKKY101 and NKKY102 strains.**

Biological replicates of the assay shown in figure 7B show consistent results that *CDR6* deletion causes Hog1 activation. Under basal conditions, the phosphorylated Hog1 levels are high in the *CDR6* null NKKY101 strain in comparison to the WT and *CDR6* revertant NKKY102 strains. Bands were quantified using Image lab Bio-Rad software, and the ratio of phosphorylated Hog1 to total Hog1 was plotted.

**Table S1. Lipid profile of NKKY101 strain compared to the WT (SC5314). The values represent the percentage of total PGL + SL + sterol mass spectral signal.**

|               | Rep1           | Rep2           | Rep3           | Rep4           | Rep1      | Rep2      | Rep3       | Rep4      |          |
|---------------|----------------|----------------|----------------|----------------|-----------|-----------|------------|-----------|----------|
| Lipid species | WT             | WT             | WT             | WT             | NKKY 101  | NKKY 101  | NKKY 101   | NKKY 101  | P value  |
| LPC(14:1)     | 0.0000         | 0.0000         | 0.0000         | 0.0000         | 0         | 0         | 0          | 0         | ns       |
| LPC(14:0)     | 0.0184         | 0.0063         | 0.0054         | 0.0142         | 0.0028103 | 0         | 0.0130503  | 0.0099345 | ns       |
| LPC(15:1)     | 0.0000         | 0.0000         | 0.0000         | 0.0005         | 0         | 0         | 0          | 0         | ns       |
| LPC(15:0)     | 0.0040         | 0.0043         | 0.0014         | 0.0016         | 0         | 0.0007624 | 0.0005674  | 0.0015284 | 0.02235  |
| LPC(16:1)     | 0.1689         | 0.1005         | 0.1659         | 0.2568         | 0.0946127 | 0.1036887 | 0.25930387 | 0.2109175 | ns       |
| LPC(16:0)     | 0.1201         | 0.0928         | 0.1088         | 0.0984         | 0.0618261 | 0.1166498 | 0.19915899 | 0.095779  | ns       |
| LPC(17:1)     | 0.0100         | 0.0092         | 0.0184         | 0.0229         | 0.0046838 | 0.0121987 | 0.02439839 | 0.0112082 | ns       |
| LPC(17:0)     | 0.0025         | 0.0014         | 0.0034         | 0.0055         | 0.0056206 | 0.009149  | 0.0124829  | 0.0053494 | 0.019731 |
| LPC(18:3)     | 0.0319         | 0.0280         | 0.0462         | 0.0492         | 0.0187352 | 0.0228725 | 0.07319518 | 0.0621544 | ns       |
| LPC(18:2)     | 0.2496         | 0.2107         | 0.3515         | 0.4809         | 0.16768   | 0.1806928 | 0.59577476 | 0.4327884 | ns       |
| LPC(18:1)     | 0.2955         | 0.2715         | 0.4038         | 0.4481         | 0.1742373 | 0.2508352 | 0.75464802 | 0.5183781 | ns       |
| LPC(18:0)     | 0.1286         | 0.1048         | 0.1074         | 0.0847         | 0.0421542 | 0.0846283 | 0.17419319 | 0.0889012 | ns       |
| LPC           | <b>1.0294</b>  | <b>0.8296</b>  | <b>1.2121</b>  | <b>1.4628</b>  | 0.5723603 | 0.7814775 | 2.10677302 | 1.4369391 | ns       |
| PC(26:1)      | 0.0020         | 0.0000         | 0.0007         | 0.0000         | 0.0009368 | 0.0015248 | 0.00113481 | 0         | ns       |
| PC(26:0)      | 0.0020         | 0.0010         | 0.0007         | 0.0000         | 0.0009368 | 0.0007624 | 0.0005674  | 0.0005095 | ns       |
| PC(28:1)      | 0.0055         | 0.0024         | 0.0041         | 0.0027         | 0.003747  | 0.0045745 | 0.00624145 | 0.0048399 | ns       |
| PC(28:0)      | 0.0025         | 0.0019         | 0.0020         | 0.0011         | 0         | 0.0030497 | 0.00113481 | 0.0002547 | ns       |
| PC(30:2)      | 0.0169         | 0.0106         | 0.0129         | 0.0076         | 0.0140514 | 0.0152483 | 0.02383099 | 0.0175765 | ns       |
| PC(30:1)      | 0.1251         | 0.0850         | 0.0639         | 0.0410         | 0.1124112 | 0.1227491 | 0.09248694 | 0.0812593 | ns       |
| PC(30:0)      | 0.0050         | 0.0019         | 0.0048         | 0.0016         | 0.003747  | 0.0038121 | 0.0005674  | 0.0015284 | ns       |
| PC(31:2)      | 0.0140         | 0.0097         | 0.0095         | 0.0038         | 0.0168617 | 0.0137235 | 0.01134809 | 0.0099345 | ns       |
| PC(31:1)      | 0.0468         | 0.0391         | 0.0238         | 0.0219         | 0.0665099 | 0.0762417 | 0.02837023 | 0.0308225 | ns       |
| PC(31:0)      | 0.0000         | 0.0000         | 0.0007         | 0.0000         | 0         | 0         | 0          | 0.0007642 | ns       |
| PC(32:2)      | 1.9283         | 1.4596         | 1.1680         | 0.7437         | 1.8828873 | 2.0371783 | 1.71356168 | 1.6590648 | ns       |
| PC(32:1)      | 1.6174         | 1.2987         | 0.9749         | 0.7382         | 1.497879  | 1.6117496 | 1.09338853 | 0.8956352 | ns       |
| PC(32:0)      | 0.0219         | 0.0478         | 0.0088         | 0.0066         | 0.0159249 | 0.0304967 | 0.00907847 | 0.0298036 | ns       |
| PC(33:2)      | 0.3712         | 0.3261         | 0.2393         | 0.1497         | 0.4955459 | 0.4993832 | 0.3126399  | 0.2679773 | ns       |
| PC(33:1)      | 0.2397         | 0.2184         | 0.1543         | 0.1169         | 0.308194  | 0.3339387 | 0.15490144 | 0.1479989 | ns       |
| PC(33:0)      | 0.0050         | 0.0000         | 0.0020         | 0.0055         | 0         | 0.0068618 | 0.00510664 | 0.0127366 | ns       |
| PC(34:4)      | 0.9572         | 0.9706         | 0.6928         | 0.3475         | 0.9592421 | 1.1161785 | 1.17395997 | 1.0655409 | 0.035134 |
| PC(34:3)      | 6.8073         | 6.5186         | 5.2429         | 3.0851         | 6.8074337 | 6.8838634 | 7.22079005 | 7.200489  | ns       |
| PC(34:2)      | 11.0755        | 10.1537        | 8.0574         | 5.2866         | 9.5343415 | 10.393269 | 9.37295543 | 8.4985995 | ns       |
| PC(34:1)      | 4.5581         | 4.2241         | 3.2863         | 2.4534         | 3.9156561 | 4.2786844 | 3.46513946 | 3.2819578 | ns       |
| PC(36:6)      | 0.0902         | 0.1073         | 0.0761         | 0.0268         | 0.0880554 | 0.1136001 | 0.13901411 | 0.1263467 | 0.043892 |
| PC(36:5)      | 1.6119         | 1.8876         | 1.4569         | 0.6366         | 1.4931952 | 1.7428853 | 2.05967844 | 1.9153245 | ns       |
| PC(36:4)      | 6.8726         | 7.6052         | 6.4380         | 3.5212         | 6.2903422 | 6.6924967 | 8.24552263 | 7.6503444 | ns       |
| PC(36:3)      | 10.5772        | 11.3925        | 9.5571         | 5.7527         | 9.1521435 | 9.3815416 | 10.9128913 | 10.410103 | ns       |
| PC(36:2)      | 7.2563         | 6.9317         | 6.2083         | 4.3687         | 5.8144683 | 5.8492635 | 6.36400921 | 6.0789072 | ns       |
| PC(36:1)      | 1.8605         | 1.6736         | 1.2434         | 1.1688         | 1.2927286 | 1.3014459 | 1.27041874 | 1.3243479 | ns       |
| PC(38:6)      | 0.0075         | 0.0092         | 0.0075         | 0.0033         | 0.0046838 | 0.0060993 | 0.00680885 | 0.006623  | ns       |
| PC(38:5)      | 0.0737         | 0.0923         | 0.0727         | 0.0443         | 0.0674467 | 0.0747169 | 0.08567808 | 0.0687774 | ns       |
| PC(38:4)      | 0.1126         | 0.1160         | 0.1176         | 0.0765         | 0.1021068 | 0.0907276 | 0.1004306  | 0.1108081 | ns       |
| PC(38:3)      | 0.2422         | 0.2416         | 0.2339         | 0.1596         | 0.1601859 | 0.16087   | 0.20710265 | 0.2137195 | ns       |
| PC(38:2)      | 0.1121         | 0.1005         | 0.1013         | 0.0683         | 0.0768143 | 0.09149   | 0.09021732 | 0.0799856 | ns       |
| PC(40:5)      | 0.0000         | 0.0000         | 0.0000         | 0.0000         | 0.0009368 | 0         | 0          | 0         | ns       |
| PC(40:4)      | 0.0015         | 0.0024         | 0.0007         | 0.0005         | 0.0009368 | 0.0007624 | 0.0005674  | 0.0015284 | ns       |
| PC(40:3)      | 0.0085         | 0.0121         | 0.0034         | 0.0038         | 0.0065573 | 0.0068618 | 0.01475252 | 0.0089156 | ns       |
| PC(40:2)      | 0.0120         | 0.0140         | 0.0136         | 0.0076         | 0.0140514 | 0.0121987 | 0.0130503  | 0.0152839 | ns       |
| PC            | <b>56.6400</b> | <b>55.5552</b> | <b>45.4803</b> | <b>28.8517</b> | 50.200959 | 52.95825  | 54.1973459 | 51.218308 | ns       |
| LPE(14:1)     | 0.0000         | 0.0000         | 0.0000         | 0.0000         | 0.0046838 | 0         | 0          | 0         | ns       |
| LPE(15:1)     | 0.0000         | 0.0000         | 0.0000         | 0.0000         | 0         | 0         | 0          | 0.0012737 | ns       |

|           |                |                |                |                |           |           |            |           |          |
|-----------|----------------|----------------|----------------|----------------|-----------|-----------|------------|-----------|----------|
| LPE(15:0) | 0.0020         | 0.0019         | 0.0000         | 0.0022         | 0         | 0.0030497 | 0.00283702 | 0.0017831 | ns       |
| LPE(16:1) | 0.1002         | 0.0647         | 0.0999         | 0.0688         | 0.0908657 | 0.0930149 | 0.124829   | 0.1243089 | ns       |
| LPE(16:0) | 0.2177         | 0.1570         | 0.1781         | 0.1475         | 0.1573757 | 0.1890794 | 0.22639441 | 0.1558955 | ns       |
| LPE(17:1) | 0.0045         | 0.0048         | 0.0034         | 0.0044         | 0.0028103 | 0         | 0.00907847 | 0.0040757 | ns       |
| LPE(17:0) | 0.0015         | 0.0053         | 0.0034         | 0.0011         | 0         | 0         | 0.0005674  | 0.0007642 | 0.022713 |
| LPE(18:3) | 0.0229         | 0.0208         | 0.0122         | 0.0104         | 0.0168617 | 0.0221101 | 0.03461168 | 0.0290394 | ns       |
| LPE(18:2) | 0.1281         | 0.1092         | 0.1332         | 0.1410         | 0.1105377 | 0.1456217 | 0.22355738 | 0.1406117 | ns       |
| LPE(18:1) | 0.1729         | 0.1585         | 0.1713         | 0.1727         | 0.1451978 | 0.1837425 | 0.33987531 | 0.2160121 | ns       |
| LPE(20:1) | 0.0000         | 0.0000         | 0.0000         | 0.0000         | 0         | 0         | 0.00340443 | 0.0007642 | ns       |
| LPE(20:0) | 0.0010         | 0.0000         | 0.0007         | 0.0000         | 0         | 0         | 0          | 0         | ns       |
| LPE       | <b>0.6507</b>  | <b>0.5223</b>  | <b>0.6023</b>  | <b>0.5481</b>  | 0.5283325 | 0.6366182 | 0.96515511 | 0.6745284 | ns       |
| PE(26:1)  | 0.0000         | 0.0000         | 0.0007         | 0.0000         | 0         | 0         | 0          | 0         | ns       |
| PE(26:0)  | 0.0015         | 0.0014         | 0.0000         | 0.0005         | 0.0009368 | 0.0007624 | 0          | 0         | ns       |
| PE(28:1)  | 0.0010         | 0.0014         | 0.0007         | 0.0005         | 0.0009368 | 0.0007624 | 0.0005674  | 0.0010189 | ns       |
| PE(30:2)  | 0.0040         | 0.0034         | 0.0020         | 0.0016         | 0.003747  | 0.0030497 | 0.00567405 | 0.0056041 | 0.043934 |
| PE(30:1)  | 0.0294         | 0.0280         | 0.0265         | 0.0284         | 0.0327866 | 0.0312591 | 0.02723542 | 0.0333698 | 0.043645 |
| PE(30:0)  | 0.0005         | 0.0024         | 0.0007         | 0.0005         | 0.0009368 | 0.0007624 | 0.00113481 | 0.0010189 | ns       |
| PE(31:2)  | 0.0025         | 0.0019         | 0.0007         | 0.0011         | 0.0028103 | 0.0038121 | 0.00397183 | 0.0025473 | 0.009221 |
| PE(31:1)  | 0.0194         | 0.0232         | 0.0143         | 0.0164         | 0.0281028 | 0.0381209 | 0.02156137 | 0.0188501 | ns       |
| PE(31:0)  | 0.0005         | 0.0000         | 0.0000         | 0.0000         | 0         | 0         | 0          | 0         | ns       |
| PE(32:2)  | 0.4240         | 0.4479         | 0.3868         | 0.4486         | 0.5583089 | 0.6556787 | 0.56456751 | 0.6070246 | 0.000364 |
| PE(32:1)  | 0.6911         | 0.7315         | 0.6431         | 0.6896         | 0.901163  | 1.020114  | 0.72798001 | 0.7616465 | 0.028341 |
| PE(32:0)  | 0.0154         | 0.0430         | 0.0061         | 0.0197         | 0.0140514 | 0.018298  | 0.01588733 | 0.0150291 | ns       |
| PE(33:2)  | 0.1151         | 0.1256         | 0.1149         | 0.1415         | 0.194846  | 0.2142392 | 0.13901411 | 0.1350076 | 0.033751 |
| PE(33:1)  | 0.1166         | 0.1232         | 0.1163         | 0.1093         | 0.2060872 | 0.2538849 | 0.12709861 | 0.1421401 | 0.033365 |
| PE(33:0)  | 0.0000         | 0.0019         | 0.0000         | 0.0011         | 0         | 0         | 0.00170221 | 0         | ns       |
| PE(34:4)  | 0.2770         | 0.3870         | 0.2944         | 0.3311         | 0.4187316 | 0.4650744 | 0.51179889 | 0.5145572 | 0.001717 |
| PE(34:3)  | 1.2367         | 1.5688         | 1.4440         | 1.4912         | 1.5868711 | 1.7695699 | 1.85654762 | 1.9298441 | 0.007068 |
| PE(34:2)  | 5.5347         | 6.2499         | 5.8894         | 6.2571         | 5.7723141 | 6.4683461 | 6.26017418 | 6.3952834 | ns       |
| PE(34:1)  | 2.5631         | 2.8341         | 2.8587         | 2.8048         | 3.0575841 | 3.5864097 | 2.88411723 | 3.5086686 | 0.018171 |
| PE(34:0)  | 0.0000         | 0.0000         | 0.0000         | 0.0000         | 0         | 0         | 0          | 0         | ns       |
| PE(35:2)  | 0.1799         | 0.2358         | 0.2230         | 0.2530         | 0.3044469 | 0.3461373 | 0.22752922 | 0.2623732 | 0.042018 |
| PE(35:1)  | 0.0623         | 0.0763         | 0.0632         | 0.0852         | 0.1077274 | 0.1212243 | 0.05617305 | 0.068268  | ns       |
| PE(35:0)  | 0.0035         | 0.0034         | 0.0027         | 0.0000         | 0.0018735 | 0.0022873 | 0.00397183 | 0.0048399 | ns       |
| PE(36:6)  | 0.0259         | 0.0469         | 0.0388         | 0.0377         | 0.0496483 | 0.054894  | 0.05674045 | 0.0647017 | 0.005662 |
| PE(36:5)  | 0.4729         | 0.6952         | 0.6085         | 0.6377         | 0.5789176 | 0.6899874 | 0.8516742  | 0.8118286 | ns       |
| PE(36:4)  | 1.9662         | 2.7815         | 2.6684         | 2.6037         | 2.5582911 | 2.6623603 | 3.22966658 | 3.3405459 | ns       |
| PE(36:3)  | 2.5412         | 3.4134         | 3.6004         | 3.5627         | 3.291774  | 3.4407881 | 4.10914361 | 4.5456796 | ns       |
| PE(36:2)  | 1.3996         | 1.8417         | 2.0144         | 2.0425         | 1.618721  | 1.8259888 | 2.05570661 | 2.3771523 | ns       |
| PE(36:1)  | 0.4719         | 0.6126         | 0.6207         | 0.6732         | 0.4749372 | 0.5260678 | 0.52371438 | 0.6416681 | ns       |
| PE(36:0)  | 0.0035         | 0.0155         | 0.0020         | 0.0055         | 0.0056206 | 0.0076242 | 0.00567405 | 0.0109534 | ns       |
| PE(37:2)  | 0.0149         | 0.0232         | 0.0177         | 0.0240         | 0.0177984 | 0.0167732 | 0.01929175 | 0.0145197 | ns       |
| PE(37:1)  | 0.0229         | 0.0246         | 0.0204         | 0.0290         | 0.0168617 | 0.0144859 | 0.01588733 | 0.0140102 | 0.001746 |
| PE(37:0)  | 0.0000         | 0.0053         | 0.0027         | 0.0005         | 0.0018735 | 0.0015248 | 0.00624145 | 0.0056041 | ns       |
| PE(38:6)  | 0.0040         | 0.0063         | 0.0075         | 0.0066         | 0.0093676 | 0.0076242 | 0.00680885 | 0.0081514 | 0.04087  |
| PE(38:5)  | 0.0095         | 0.0121         | 0.0143         | 0.0153         | 0.0093676 | 0.0121987 | 0.01361771 | 0.0150291 | ns       |
| PE(38:4)  | 0.0219         | 0.0222         | 0.0245         | 0.0235         | 0.0187352 | 0.0198228 | 0.02723542 | 0.0241995 | ns       |
| PE(38:3)  | 0.0259         | 0.0333         | 0.0388         | 0.0350         | 0.0243558 | 0.0259222 | 0.0374487  | 0.036936  | ns       |
| PE(38:2)  | 0.0289         | 0.0329         | 0.0455         | 0.0393         | 0.0309131 | 0.0343088 | 0.0380161  | 0.0478895 | ns       |
| PE(38:1)  | 0.0050         | 0.0043         | 0.0027         | 0.0033         | 0.0028103 | 0.0030497 | 0.00170221 | 0.0056041 | ns       |
| PE(38:0)  | 0.0000         | 0.0000         | 0.0000         | 0.0000         | 0         | 0         | 0          | 0         | ns       |
| PE(40:3)  | 0.0000         | 0.0000         | 0.0000         | 0.0000         | 0         | 0         | 0          | 0         | ns       |
| PE(40:2)  | 0.0010         | 0.0014         | 0.0007         | 0.0000         | 0         | 0         | 0          | 0.0002547 | 0.03028  |
| PE(42:4)  | 0.0000         | 0.0000         | 0.0000         | 0.0000         | 0         | 0         | 0          | 0         | ns       |
| PE(42:3)  | 0.0000         | 0.0005         | 0.0000         | 0.0011         | 0         | 0         | 0          | 0         | ns       |
| PE(42:2)  | 0.0085         | 0.0082         | 0.0068         | 0.0082         | 0.0065573 | 0.0076242 | 0.00737626 | 0.0084061 | ns       |
| PE        | <b>18.3018</b> | <b>22.4715</b> | <b>21.8227</b> | <b>22.4301</b> | 21.910812 | 24.350838 | 24.4426523 | 26.380226 | 0.033703 |
| PI(26:0)  | 0.0005         | 0.0000         | 0.0000         | 0.0000         | 0         | 0.0007624 | 0          | 0         | ns       |
| PI(28:0)  | 0.0000         | 0.0000         | 0.0000         | 0.0000         | 0         | 0         | 0          | 0         | ns       |

|          |               |               |               |               |           |           |            |           |          |
|----------|---------------|---------------|---------------|---------------|-----------|-----------|------------|-----------|----------|
| PI(30:2) | 0.0000        | 0.0000        | 0.0000        | 0.0005        | 0         | 0         | 0          | 0         | ns       |
| PI(30:1) | 0.0065        | 0.0039        | 0.0027        | 0.0044        | 0.0028103 | 0.0007624 | 0          | 0.0017831 | 0.011533 |
| PI(30:0) | 0.0000        | 0.0000        | 0.0000        | 0.0000        | 0         | 0         | 0          | 0         | ns       |
| PI(31:2) | 0.0000        | 0.0000        | 0.0000        | 0.0000        | 0         | 0         | 0          | 0         | ns       |
| PI(31:1) | 0.0304        | 0.0280        | 0.0258        | 0.0279        | 0.0374704 | 0.0251598 | 0.01645473 | 0.0140102 | ns       |
| PI(31:0) | 0.0000        | 0.0000        | 0.0000        | 0.0000        | 0.0009368 | 0         | 0          | 0         | ns       |
| PI(32:2) | 0.0419        | 0.0266        | 0.0428        | 0.0530        | 0.0206087 | 0.0076242 | 0.01985916 | 0.0213974 | 0.004868 |
| PI(32:1) | 0.2526        | 0.1503        | 0.2006        | 0.2590        | 0.1358302 | 0.0571813 | 0.10383503 | 0.1271109 | 0.006072 |
| PI(32:0) | 0.0060        | 0.0000        | 0.0000        | 0.0000        | 0         | 0         | 0.00113481 | 0         | ns       |
| PI(33:2) | 0.0339        | 0.0208        | 0.0299        | 0.0432        | 0.027166  | 0.009149  | 0.01645473 | 0.0165575 | 0.024637 |
| PI(33:1) | 0.0688        | 0.0416        | 0.0564        | 0.0803        | 0.0496483 | 0.0152483 | 0.02837023 | 0.034134  | 0.017078 |
| PI(33:0) | 0.0000        | 0.0000        | 0.0000        | 0.0000        | 0         | 0         | 0.00283702 | 0         | ns       |
| PI(34:4) | 0.0095        | 0.0053        | 0.0095        | 0.0148        | 0.0028103 | 0.0015248 | 0.00340443 | 0.0101893 | ns       |
| PI(34:3) | 0.1794        | 0.1024        | 0.1815        | 0.2290        | 0.0908657 | 0.0503195 | 0.09362175 | 0.1072419 | 0.011571 |
| PI(34:2) | 2.3638        | 1.6234        | 2.5079        | 3.1649        | 1.2355862 | 0.5535148 | 1.25623363 | 1.4068808 | 0.006207 |
| PI(34:1) | 2.2123        | 1.3151        | 2.0259        | 2.3879        | 1.1784439 | 0.491759  | 1.09849517 | 1.2300973 | 0.007381 |
| PI(35:2) | 0.0742        | 0.0560        | 0.0693        | 0.0891        | 0.0590159 | 0.0167732 | 0.03234206 | 0.0422854 | 0.010664 |
| PI(35:1) | 0.0872        | 0.0556        | 0.0789        | 0.1044        | 0.0599526 | 0.0259222 | 0.03461168 | 0.0382097 | 0.007649 |
| PI(35:0) | 0.0040        | 0.0014        | 0.0000        | 0.0038        | 0         | 0.0083866 | 0          | 0         | ns       |
| PI(36:6) | 0.0000        | 0.0000        | 0.0000        | 0.0000        | 0         | 0         | 0          | 0         | ns       |
| PI(36:5) | 0.0224        | 0.0232        | 0.0347        | 0.0475        | 0.0131146 | 0.0022873 | 0.01702214 | 0.0264921 | 0.033838 |
| PI(36:4) | 0.1216        | 0.0976        | 0.1557        | 0.2044        | 0.050585  | 0.0282094 | 0.08227366 | 0.1100439 | 0.019525 |
| PI(36:3) | 0.2167        | 0.1343        | 0.2767        | 0.3208        | 0.0983598 | 0.0465074 | 0.12936823 | 0.159207  | 0.016862 |
| PI(36:2) | 0.4958        | 0.3247        | 0.5860        | 0.6502        | 0.1967196 | 0.0831035 | 0.27065196 | 0.353567  | 0.009719 |
| PI(36:1) | 0.3308        | 0.2034        | 0.3630        | 0.3759        | 0.1330199 | 0.054894  | 0.175328   | 0.2213615 | 0.008743 |
| PI(38:2) | 0.0020        | 0.0010        | 0.0041        | 0.0022        | 0         | 0         | 0          | 0.0022926 | 0.046101 |
| PI(38:1) | 0.0040        | 0.0005        | 0.0034        | 0.0022        | 0.0018735 | 0         | 0          | 0.0030568 | ns       |
| PI(38:0) | 0.0000        | 0.0010        | 0.0041        | 0.0000        | 0         | 0         | 0          | 0.0050946 | ns       |
| PI       | <b>6.5642</b> | <b>4.2159</b> | <b>6.6590</b> | <b>8.0652</b> | 3.3948176 | 1.479089  | 3.3822984  | 3.931013  | 0.006731 |
| PS(30:2) | 0.0000        | 0.0005        | 0.0000        | 0.0000        | 0         | 0         | 0          | 0.0002547 | ns       |
| PS(30:1) | 0.0075        | 0.0068        | 0.0116        | 0.0142        | 0.0046838 | 0         | 0.00567405 | 0.0078967 | 0.032786 |
| PS(30:0) | 0.0005        | 0.0005        | 0.0007        | 0.0000        | 0.0009368 | 0.0007624 | 0          | 0         | ns       |
| PS(32:2) | 0.0249        | 0.0319        | 0.0578        | 0.1038        | 0.0327866 | 0.0152483 | 0.03177465 | 0.040757  | ns       |
| PS(32:1) | 0.2571        | 0.2735        | 0.4385        | 0.6781        | 0.2866485 | 0.1639197 | 0.21220929 | 0.3105174 | ns       |
| PS(32:0) | 0.0025        | 0.0000        | 0.0000        | 0.0049        | 0         | 0.0045745 | 0.00453924 | 0         | ns       |
| PS(33:2) | 0.0154        | 0.0242        | 0.0374        | 0.0781        | 0.0215455 | 0.0099114 | 0.02212878 | 0.0259826 | ns       |
| PS(33:1) | 0.0563        | 0.0672        | 0.1176        | 0.1880        | 0.0796246 | 0.0465074 | 0.050499   | 0.0782025 | ns       |
| PS(33:0) | 0.0000        | 0.0000        | 0.0000        | 0.0000        | 0         | 0         | 0          | 0         | ns       |
| PS(34:4) | 0.0040        | 0.0029        | 0.0082        | 0.0104        | 0.003747  | 0.0038121 | 0.00113481 | 0.0063683 | ns       |
| PS(34:3) | 0.0703        | 0.0807        | 0.1598        | 0.2863        | 0.0814981 | 0.0434578 | 0.07830183 | 0.1286393 | ns       |
| PS(34:2) | 1.2845        | 1.5132        | 2.8573        | 5.2347        | 1.3348828 | 0.6564411 | 1.47014514 | 2.1382143 | ns       |
| PS(34:1) | 1.6772        | 1.6925        | 3.0518        | 4.4446        | 1.622468  | 0.7662291 | 1.55185139 | 2.2974214 | ns       |
| PS(34:0) | 0.0080        | 0.0077        | 0.0170        | 0.0454        | 0         | 0.0106738 | 0.01645473 | 0.0234353 | ns       |
| PS(35:2) | 0.0364        | 0.0507        | 0.0789        | 0.1377        | 0.0365336 | 0.0266846 | 0.03971832 | 0.0519652 | ns       |
| PS(35:1) | 0.0603        | 0.0546        | 0.0870        | 0.1388        | 0.0440277 | 0.0236349 | 0.03971832 | 0.0624092 | 0.042911 |
| PS(35:0) | 0.0000        | 0.0000        | 0.0000        | 0.0011        | 0         | 0         | 0.0005674  | 0         | ns       |
| PS(36:6) | 0.0000        | 0.0000        | 0.0000        | 0.0022        | 0.0009368 | 0         | 0.0005674  | 0.0002547 | ns       |
| PS(36:5) | 0.0095        | 0.0130        | 0.0258        | 0.0301        | 0.0084308 | 0.0045745 | 0.00964588 | 0.0173217 | ns       |
| PS(36:4) | 0.0259        | 0.0425        | 0.0782        | 0.1126        | 0.0402807 | 0.0152483 | 0.03063984 | 0.0738721 | ns       |
| PS(36:3) | 0.0608        | 0.0783        | 0.1455        | 0.2180        | 0.0571423 | 0.0282094 | 0.06922335 | 0.1255825 | ns       |
| PS(36:2) | 0.1734        | 0.2005        | 0.3508        | 0.5552        | 0.1105377 | 0.0449826 | 0.1503622  | 0.2717983 | ns       |
| PS(36:1) | 0.1076        | 0.1140        | 0.1883        | 0.2617        | 0.0580791 | 0.0160108 | 0.06979076 | 0.145961  | 0.039679 |
| PS(36:0) | 0.0005        | 0.0019        | 0.0000        | 0.0000        | 0         | 0         | 0.00283702 | 0.0020379 | ns       |
| PS(38:6) | 0.0000        | 0.0000        | 0.0000        | 0.0000        | 0         | 0         | 0          | 0         | ns       |
| PS(38:5) | 0.0000        | 0.0000        | 0.0000        | 0.0000        | 0         | 0         | 0          | 0         | ns       |
| PS(38:4) | 0.0020        | 0.0010        | 0.0027        | 0.0022        | 0.0009368 | 0.0015248 | 0.00170221 | 0.0002547 | ns       |
| PS(38:3) | 0.0020        | 0.0000        | 0.0000        | 0.0000        | 0         | 0         | 0          | 0.0002547 | ns       |
| PS(38:2) | 0.0000        | 0.0000        | 0.0000        | 0.0000        | 0         | 0         | 0          | 0         | ns       |
| PS(38:1) | 0.0000        | 0.0000        | 0.0000        | 0.0000        | 0         | 0         | 0.0005674  | 0         | ns       |



|                 |               |               |               |                |           |           |            |           |          |
|-----------------|---------------|---------------|---------------|----------------|-----------|-----------|------------|-----------|----------|
| PS(40:4)        | 0.0000        | 0.0000        | 0.0000        | 0.0000         | 0         | 0.0007624 | 0          | 0         | ns       |
| PS(40:3)        | 0.0000        | 0.0000        | 0.0000        | 0.0000         | 0         | 0         | 0.0005674  | 0         | ns       |
| PS(40:2)        | 0.0000        | 0.0000        | 0.0000        | 0.0000         | 0         | 0         | 0          | 0         | ns       |
| PS(40:1)        | 0.0000        | 0.0014        | 0.0000        | 0.0000         | 0         | 0.0007624 | 0.0005674  | 0         | ns       |
| PS(42:4)        | 0.0000        | 0.0000        | 0.0000        | 0.0000         | 0         | 0         | 0          | 0         | ns       |
| PS(42:3)        | 0.0000        | 0.0000        | 0.0000        | 0.0000         | 0.0009368 | 0         | 0          | 0         | ns       |
| PS(42:2)        | 0.0005        | 0.0024        | 0.0007        | 0.0000         | 0.0009368 | 0         | 0          | 0.0015284 | ns       |
| PS(42:1)        | 0.0000        | 0.0010        | 0.0000        | 0.0000         | 0         | 0         | 0          | 0         | ns       |
| PS(44:3)        | 0.0000        | 0.0000        | 0.0000        | 0.0000         | 0         | 0         | 0          | 0.0017831 | ns       |
| PS(44:2)        | 0.0000        | 0.0000        | 0.0000        | 0.0000         | 0         | 0         | 0          | 0         | ns       |
| PS              | <b>3.8870</b> | <b>4.2628</b> | <b>7.7154</b> | <b>12.5481</b> | 3.8276007 | 1.8839325 | 3.86118783 | 5.812713  | ns       |
| PA(32:2)        | 0.0698        | 0.0469        | 0.1217        | 0.1044         | 0.0627629 | 0.078529  | 0.05447083 | 0.0664849 | ns       |
| PA(32:1)        | 0.3164        | 0.1512        | 0.2339        | 0.2202         | 0.2201386 | 0.2096647 | 0.13107045 | 0.1031662 | ns       |
| PA(32:0)        | 0.0035        | 0.0000        | 0.0041        | 0.0000         | 0         | 0         | 0          | 0.0005095 | ns       |
| PA(34:6)        | 0.0000        | 0.0000        | 0.0000        | 0.0000         | 0         | 0         | 0          | 0         | ns       |
| PA(34:5)        | 0.0005        | 0.0000        | 0.0000        | 0.0000         | 0         | 0         | 0          | 0         | ns       |
| PA(34:4)        | 0.0174        | 0.0271        | 0.0517        | 0.0568         | 0.0140514 | 0.0327839 | 0.01985916 | 0.0234353 | ns       |
| PA(34:3)        | 0.1943        | 0.1503        | 0.3542        | 0.3683         | 0.1629962 | 0.25236   | 0.15376663 | 0.1981809 | ns       |
| PA(34:2)        | 1.1799        | 0.6716        | 1.2013        | 1.2590         | 0.8243486 | 0.9225246 | 0.69620536 | 0.704332  | 0.047266 |
| PA(34:1)        | 1.6886        | 0.7431        | 1.1659        | 0.9956         | 1.1091236 | 1.0460362 | 0.70585124 | 0.7127381 | ns       |
| PA(36:6)        | 0.0020        | 0.0005        | 0.0041        | 0.0011         | 0         | 0.0022873 | 0.00226962 | 0.0005095 | ns       |
| PA(36:5)        | 0.0319        | 0.0314        | 0.0789        | 0.0721         | 0.0365336 | 0.0594685 | 0.03517908 | 0.0417759 | ns       |
| PA(36:4)        | 0.1166        | 0.1193        | 0.2651        | 0.2803         | 0.093676  | 0.1547707 | 0.13617709 | 0.1594618 | ns       |
| PA(36:3)        | 0.2153        | 0.1638        | 0.4120        | 0.4584         | 0.1967196 | 0.2416862 | 0.23093364 | 0.299564  | ns       |
| PA(36:2)        | 0.2601        | 0.1913        | 0.4208        | 0.4404         | 0.1592492 | 0.2371117 | 0.22979883 | 0.2947241 | ns       |
| PA(36:1)        | 0.1096        | 0.0672        | 0.1285        | 0.1344         | 0.0562056 | 0.0571813 | 0.05617305 | 0.0708153 | 0.009418 |
| PA              | <b>4.2059</b> | <b>2.3635</b> | <b>4.4420</b> | <b>4.3911</b>  | 2.9358053 | 3.294404  | 2.45175497 | 2.6756973 | ns       |
| PG(30:1)        | 0.0000        | 0.0024        | 0.0000        | 0.0022         | 0         | 0.0060993 | 0          | 0         | ns       |
| PG(30:0)        | 0.0000        | 0.0000        | 0.0000        | 0.0000         | 0         | 0         | 0          | 0         | ns       |
| PG(32:2)        | 0.0239        | 0.0053        | 0.0000        | 0.0038         | 0.0065573 | 0.009149  | 0.01985916 | 0.010444  | ns       |
| PG(32:1)        | 0.1251        | 0.1077        | 0.1183        | 0.1104         | 0.0992965 | 0.0381209 | 0.09532396 | 0.122271  | ns       |
| PG(32:0)        | 0.0000        | 0.0000        | 0.0007        | 0.0000         | 0         | 0.0045745 | 0.00510664 | 0         | ns       |
| PG(34:4)        | 0.0000        | 0.0000        | 0.0000        | 0.0000         | 0         | 0         | 0.00340443 | 0.0022926 | ns       |
| PG(34:3)        | 0.0513        | 0.0420        | 0.0258        | 0.0366         | 0.0346601 | 0.0060993 | 0.04312274 | 0.0580787 | ns       |
| PG(34:2)        | 0.6443        | 0.6262        | 0.7764        | 0.8803         | 0.5302061 | 0.4589751 | 0.99352533 | 0.9707809 | ns       |
| PG(34:1)        | 0.8206        | 0.6967        | 0.7560        | 0.9885         | 0.6257556 | 0.5741    | 0.86075267 | 0.9740924 | ns       |
| PG(34:0)        | 0.0000        | 0.0000        | 0.0000        | 0.0000         | 0         | 0         | 0          | 0         | ns       |
| PG(36:4)        | 0.0419        | 0.0106        | 0.0068        | 0.0306         | 0.0112411 | 0.027447  | 0.03971832 | 0.0440685 | ns       |
| PG(36:3)        | 0.0284        | 0.0145        | 0.0360        | 0.0311         | 0.0028103 | 0.0167732 | 0.02156137 | 0.0305678 | ns       |
| PG(36:2)        | 0.0254        | 0.0184        | 0.0252        | 0.0432         | 0.0159249 | 0.018298  | 0.02212878 | 0.0333698 | ns       |
| PG(36:1)        | 0.0214        | 0.0155        | 0.0224        | 0.0235         | 0.0056206 | 0.0045745 | 0.0130503  | 0.0089156 | 0.001457 |
| PG(38:6)        | 0.0000        | 0.0000        | 0.0000        | 0.0000         | 0         | 0         | 0          | 0         | ns       |
| PG(38:5)        | 0.0000        | 0.0000        | 0.0000        | 0.0000         | 0         | 0         | 0          | 0         | ns       |
| PG              | <b>1.7823</b> | <b>1.5393</b> | <b>1.7676</b> | <b>2.1502</b>  | 1.3320725 | 1.1642108 | 2.11755371 | 2.2548813 | ns       |
| IPC<br>(42:0-2) | 0.0044        | 0.0015        | 0.0188        | 0.0144         | 0         | 0.0014066 | 0.00093267 | 0.0076873 | ns       |
| IPC<br>(42:0-3) | 0.3935        | 0.3081        | 1.3291        | 0.8992         | 0.1518499 | 0.0453528 | 0.37950369 | 0.4892712 | ns       |
| IPC<br>(44:0-2) | 0.0702        | 0.0891        | 0.0000        | 0.0047         | 0.0554414 | 0.0078491 | 0.0106468  | 0.011798  | ns       |
| IPC<br>(43:0-3) | 0.0556        | 0.0490        | 0.1867        | 0.1377         | 0.0430065 | 0.0129488 | 0.06640196 | 0.0794089 | ns       |
| IPC<br>(42:0-4) | 0.0053        | 0.0056        | 0.0282        | 0.0088         | 0.0011297 | 0         | 0.00793488 | 0.0133392 | ns       |
| IPC<br>(44:0-3) | 0.7846        | 0.6007        | 2.3884        | 1.2461         | 0.1789163 | 0.0642777 | 0.6766811  | 1.0294714 | ns       |
| IPC<br>(46:0-2) | 0.0097        | 0.0097        | 0.0000        | 0.0009         | 0.0065151 | 0.0062267 | 0.0046636  | 0.0049584 | ns       |
| IPC<br>(45:0-3) | 0.1322        | 0.0860        | 0.2995        | 0.1819         | 0.052055  | 0.0211046 | 0.09238785 | 0.123019  | 0.04547  |

|                                   |               |               |               |                |           |           |            |           |          |
|-----------------------------------|---------------|---------------|---------------|----------------|-----------|-----------|------------|-----------|----------|
| <b>IPC</b><br><b>(44:0-4)</b>     | 0.0000        | 0.0000        | 0.0029        | 0.0000         | 0         | 0         | 0          | 0.0019583 | ns       |
| <b>IPC</b><br><b>(46:0-3)</b>     | 0.1063        | 0.0782        | 0.2352        | 0.1369         | 0.0387952 | 0.0093616 | 0.07023859 | 0.0955098 | 0.03519  |
| <b>IPC</b><br><b>(46:0-4)</b>     | 0.0000        | 0.0000        | 0.0000        | 0.0008         | 0         | 0         | 0          | 0.0007718 | ns       |
| <b>IPC</b>                        | <b>1.5617</b> | <b>1.2278</b> | <b>4.4887</b> | <b>2.6314</b>  | 0.5277091 | 0.168528  | 1.30939113 | 1.8571934 | ns       |
| <b>MIPC</b><br><b>(42:0-2)</b>    | 0.0000        | 0.0000        | 0.0000        | 0.0000         | 0         | 0         | 0          | 0         | ns       |
| <b>MIPC</b><br><b>(42:0-3)</b>    | 0.0198        | 0.0391        | 0.0518        | 0.0734         | 0.0045523 | 0.0015406 | 0.00977117 | 0.010661  | 0.006907 |
| <b>MIPC</b><br><b>(42:0-4)</b>    | 0.0006        | 0.0000        | 0.0000        | 0.0000         | 0.0048375 | 0         | 0          | 0         | ns       |
| <b>MIPC</b><br><b>(43:0-3)</b>    | 0.0007        | 0.0000        | 0.0018        | 0.0017         | 0.0005979 | 0         | 0          | 0.0002419 | ns       |
| <b>MIPC</b><br><b>(44:0-2)</b>    | 0.0000        | 0.0000        | 0.0000        | 0.0000         | 0         | 0         | 0          | 0         | ns       |
| <b>MIPC</b><br><b>(44:0-3)</b>    | 0.0278        | 0.0441        | 0.0732        | 0.0610         | 0.0213959 | 0.002894  | 0.00772604 | 0.0125067 | 0.004565 |
| <b>MIPC</b><br><b>(44:0-4)</b>    | 0.0000        | 0.0000        | 0.0000        | 0.0000         | 0         | 0         | 0          | 0         | ns       |
| <b>MIPC</b><br><b>(45:0-3)</b>    | 0.0000        | 0.0009        | 0.0034        | 0.0019         | 0         | 0         | 0          | 0.0004262 | ns       |
| <b>MIPC</b><br><b>(46:0-2)</b>    | 0.0000        | 0.0000        | 0.0000        | 0.0000         | 0         | 0         | 0          | 0         | ns       |
| <b>MIPC</b><br><b>(46:0-3)</b>    | 0.0008        | 0.0000        | 0.0000        | 0.0012         | 0         | 0         | 0          | 0         | ns       |
| <b>MIPC</b><br><b>(46:0-4)</b>    | 0.0000        | 0.0000        | 0.0000        | 0.0000         | 0         | 0         | 0          | 0         | ns       |
| <b>MIPC</b>                       | <b>0.0498</b> | <b>0.0840</b> | <b>0.1302</b> | <b>0.1391</b>  | 0.0313835 | 0.0044346 | 0.01749721 | 0.0238359 | 0.004638 |
| <b>M(IP)2C</b><br><b>(42:0-2)</b> | 0.0000        | 0.0000        | 0.0000        | 0.0000         | 0         | 0         | 0          | 0         | ns       |
| <b>M(IP)2C</b><br><b>(42:0-3)</b> | 0.0000        | 0.0000        | 0.0000        | 0.0000         | 0         | 0         | 0          | 0         | ns       |
| <b>M(IP)2C</b><br><b>(42:0-4)</b> | 0.0000        | 0.0000        | 0.0000        | 0.0000         | 0         | 0         | 0          | 0         | ns       |
| <b>M(IP)2C</b><br><b>(43:0-3)</b> | 0.0000        | 0.0000        | 0.0000        | 0.0000         | 0         | 0         | 0          | 0         | ns       |
| <b>M(IP)2C</b><br><b>(44:0-2)</b> | 0.0000        | 0.0000        | 0.0000        | 0.0000         | 0         | 0         | 0          | 0         | ns       |
| <b>M(IP)2C</b><br><b>(44:0-3)</b> | 0.0000        | 0.0006        | 0.0000        | 0.0000         | 0         | 0         | 0          | 0         | ns       |
| <b>M(IP)2C</b><br><b>(44:0-4)</b> | 0.0000        | 0.0000        | 0.0000        | 0.0000         | 0         | 0         | 0          | 0         | ns       |
| <b>M(IP)2C</b><br><b>(45:0-3)</b> | 0.0000        | 0.0000        | 0.0000        | 0.0000         | 0         | 0         | 0          | 0         | ns       |
| <b>M(IP)2C</b><br><b>(46:0-2)</b> | 0.0000        | 0.0000        | 0.0000        | 0.0000         | 0         | 0         | 0          | 0         | ns       |
| <b>M(IP)2C</b><br><b>(46:0-3)</b> | 0.0000        | 0.0000        | 0.0000        | 0.0000         | 0         | 0         | 0          | 0         | ns       |
| <b>M(IP)2C</b><br><b>(46:0-4)</b> | 0.0000        | 0.0000        | 0.0000        | 0.0000         | 0         | 0         | 0          | 0         | ns       |
| <b>M(IP)2C</b>                    | <b>0.0000</b> | <b>0.0006</b> | <b>0.0000</b> | <b>0.0000</b>  | 0         | 0         | 0          | 0         | ns       |
| <b>Zymosterone</b>                | 0.6402        | 0.7292        | 0.5513        | 1.5771         | 3.9263478 | 3.5559596 | 0.69727244 | 0.5446925 | ns       |
| <b>Zymosterol</b>                 | 0.0306        | 0.1469        | 0.0506        | 0.1728         | 0.0050162 | 0.0117354 | 0.01288236 | 0.0098306 | 0.021062 |
| <b>Ergostatetraenol</b>           | 0.7003        | 1.0428        | 0.7400        | 2.4271         | 0.6760604 | 0.5295595 | 0.55066358 | 0.4320042 | ns       |
| <b>Ergosterol</b>                 | 3.0694        | 4.0378        | 3.5628        | 10.2314        | 7.4403157 | 6.7001709 | 3.20968411 | 2.2569729 | ns       |
| <b>Episterol +<br/>Fecosterol</b> | 0.7331        | 0.8307        | 0.6897        | 2.0890         | 2.0901877 | 1.9225076 | 0.56656717 | 0.4093715 | ns       |
| <b>Lanosterol</b>                 | 0.1536        | 0.1401        | 0.0852        | 0.2850         | 0.6002191 | 0.558285  | 0.11132075 | 0.0817933 | ns       |
| <b>Sterols</b>                    | <b>5.3272</b> | <b>6.9275</b> | <b>5.6797</b> | <b>16.7824</b> | 14.738147 | 13.278218 | 5.14839041 | 3.7346649 | ns       |

**Table S2. The genes with  $\geq 2$ -fold down and up-regulated change are listed.**

| Gene downregulated more than $\geq 2$ fold in NKKY101 as compared to WT strain |                    |                                                                 |           | Gene upregulated more than $\geq 2$ fold in NKKY101 as compared to WT strain |                    |                                                                 |             |
|--------------------------------------------------------------------------------|--------------------|-----------------------------------------------------------------|-----------|------------------------------------------------------------------------------|--------------------|-----------------------------------------------------------------|-------------|
| ORF ID                                                                         | Standard gene name | Expression fold values of NKKY101 V/S WT in terms of log base 2 | p-Value   | ORF ID                                                                       | Standard gene name | Expression fold values of NKKY101 V/S WT in terms of log base 2 | p-Value     |
| orf19.204                                                                      |                    | -5.14                                                           | 0.0007908 | orf19.3903                                                                   |                    | 4.24                                                            | 0.011421185 |
| orf19.1958                                                                     |                    | -4.81                                                           | 0.0035298 | orf19.4011                                                                   |                    | 3.70                                                            | 0.000363189 |
| orf19.4672                                                                     |                    | -4.79                                                           | 0.0080239 | orf19.4211                                                                   | FET3               | 3.49                                                            | 0.003849387 |
| orf19.5353                                                                     |                    | -4.27                                                           | 0.001528  | orf19.4949                                                                   |                    | 3.28                                                            | 0.012472864 |
| orf19.3740                                                                     | PGA23              | -4.15                                                           | 0.0059798 | orf19.6339                                                                   | NRG2               | 3.16                                                            | 0.01920596  |
| orf19.4082                                                                     | DDR48              | -3.97                                                           | 0.0029619 | orf19.3186                                                                   |                    | 2.55                                                            | 0.007040285 |
| orf19.4279                                                                     | MNN1               | -3.42                                                           | 0.0014907 | orf19.5753                                                                   | HGT10              | 2.55                                                            | 0.002482586 |
| orf19.529.1                                                                    |                    | -3.04                                                           | 0.1297763 | orf19.7054                                                                   |                    | 2.47                                                            | 0.001897678 |
| orf19.935                                                                      | AGA1               | -2.90                                                           | 0.0159327 | orf19.1539                                                                   |                    | 2.46                                                            | 0.055939898 |
| orf19.4477                                                                     | CSH1               | -2.77                                                           | 0.0045258 | orf19.5557                                                                   | MNN4-4             | 2.24                                                            | 0.058547758 |
| orf19.4255                                                                     | ECM331             | -2.67                                                           | 0.0025152 | orf19.3924                                                                   |                    | 2.23                                                            | 0.13903569  |
| orf19.4135                                                                     | PRC2               | -2.55                                                           | 0.0056925 | orf19.2025                                                                   |                    | 1.98                                                            | 0.000772328 |
| orf19.246                                                                      | YIL108W            | -2.51                                                           | 0.0100478 | orf19.7514                                                                   | PCK1               | 1.96                                                            | 0.00603393  |
| orf19.2018.2                                                                   |                    | -2.49                                                           | 0.0827134 | orf19.6715                                                                   |                    | 1.84                                                            | 0.10801494  |
| orf19.3711                                                                     |                    | -2.46                                                           | 0.1460939 | orf19.5179                                                                   | LIP5               | 1.83                                                            | 0.2121436   |
| orf19.2125                                                                     |                    | -2.39                                                           | 0.0020768 | orf19.1311                                                                   | SPO75              | 1.80                                                            | 0.041305322 |
| orf19.1287                                                                     |                    | -2.28                                                           | 0.0296229 | orf19.7094                                                                   | HGT12              | 1.72                                                            | 0.002039461 |
| orf19.4690                                                                     |                    | -2.27                                                           | 0.0171247 | orf19.7614                                                                   |                    | 1.72                                                            | 0.23199211  |
| orf19.5025                                                                     | MET3               | -2.21                                                           | 3.523E-05 | CaalfMp08.1                                                                  |                    | 1.69                                                            | 0.011596016 |
| orf19.3925                                                                     |                    | -2.15                                                           | 0.0061147 | orf19.7024                                                                   |                    | 1.68                                                            | 0.038610507 |
| orf19.6595                                                                     | RTA4               | -2.11                                                           | 0.0034165 | orf19.5454                                                                   | DAL1               | 1.68                                                            | 0.005256803 |
| orf19.5645                                                                     | MET15              | -2.11                                                           | 0.0025522 | orf19.1321                                                                   | HWP1               | 1.65                                                            | 0.08613683  |
| orf19.5636                                                                     | RBT5               | -2.04                                                           | 0.0339771 | orf19.2247                                                                   |                    | 1.59                                                            | 0.031574003 |
| orf19.2060                                                                     | SOD5               | -2.01                                                           | 0.1290168 | orf19.341                                                                    |                    | 1.57                                                            | 0.001795389 |
| orf19.5070                                                                     |                    | -2.00                                                           | 0.0028854 | orf19.3499                                                                   |                    | 1.57                                                            | 0.000671106 |
| orf19.675.1                                                                    |                    | -1.91                                                           | 0.0642697 | orf19.7111.1                                                                 | SOD3               | 1.57                                                            | 0.07692626  |
| orf19.5820                                                                     | UGA6               | -1.89                                                           | 0.0166356 | orf19.2010                                                                   |                    | 1.53                                                            | 0.11906428  |
| orf19.1691                                                                     |                    | -1.88                                                           | 0.0209512 | orf19.1438                                                                   |                    | 1.50                                                            | 0.024923095 |
| orf19.7585                                                                     | INO1               | -1.88                                                           | 0.0324935 | orf19.7107                                                                   | ALB1               | 1.47                                                            | 0.012372312 |
| orf19.1746                                                                     | SSP2               | -1.87                                                           | 0.0569535 | orf19.5302                                                                   | PGA31              | 1.47                                                            | 0.006413819 |
| orf19.6311                                                                     | YPR036W-A          | -1.86                                                           | 0.0843973 | orf19.5975                                                                   | TRY4               | 1.47                                                            | 0.045568768 |
| orf19.3760                                                                     | DLH1               | -1.80                                                           | 0.0401389 | orf19.7424                                                                   | NSA2               | 1.45                                                            | 0.018903585 |

|              |         |       |           |              |           |      |             |
|--------------|---------|-------|-----------|--------------|-----------|------|-------------|
| orf19.7348   |         | -1.78 | 0.0870595 | orf19.962    |           | 1.43 | 0.008619217 |
| orf19.251    |         | -1.77 | 0.0042697 | orf19.183    | HIS3      | 1.43 | 0.022013247 |
| orf19.6877   | PNG2    | -1.76 | 0.0028092 | orf19.3905   |           | 1.43 | 0.014047149 |
| orf19.5674   | PGA10   | -1.75 | 0.0307206 | orf19.3015   | ARX1      | 1.42 | 0.004620787 |
| orf19.473    | TPO4    | -1.74 | 0.0010228 | orf19.7664   | YCR087C-A | 1.42 | 0.010747111 |
| orf19.7252   |         | -1.73 | 0.0115687 | orf19.1030   | FPR3      | 1.42 | 0.003132167 |
| orf19.1363   | YOR338W | -1.71 | 0.0838175 | orf19.6090   | NSR1      | 1.37 | 0.007307823 |
| orf19.769    | IFE1    | -1.65 | 0.0249859 | orf19.3374   | ECE1      | 1.37 | 0.004684069 |
| orf19.7313   | SSU1    | -1.61 | 0.030863  | orf19.4342   | SUT1      | 1.36 | 0.00586101  |
| orf19.3839   | SAP10   | -1.57 | 0.0040356 | orf19.3935   |           | 1.36 | 0.007634747 |
| orf19.6661   |         | -1.57 | 0.3672059 | orf19.2917   | NUG1      | 1.34 | 0.009257467 |
| orf19.4979   | KNS1    | -1.56 | 0.0038777 | orf19.4921.1 |           | 1.34 | 0.024404883 |
| orf19.2916   |         | -1.56 | 0.0390269 | orf19.3954.1 |           | 1.34 | 0.044517133 |
| orf19.5144   | PGA28   | -1.54 | 0.0204007 | orf19.3478   | NIP7      | 1.34 | 0.013678166 |
| orf19.6489   | FMP45   | -1.54 | 0.0456107 | orf19.2633.1 |           | 1.32 | 0.00546027  |
| orf19.3932   |         | -1.54 | 0.0057875 | orf19.3897   |           | 1.32 | 0.012088503 |
| orf19.2878   | PGA15   | -1.54 | 0.0043    | orf19.4793   | TMA16     | 1.31 | 0.01846747  |
| orf19.413    |         | -1.52 | 0.0057506 | orf19.4870   | DBP3      | 1.30 | 0.005895993 |
| orf19.4688   | DAG7    | -1.52 | 0.0118877 | orf19.1701   | RK11      | 1.30 | 0.003033646 |
| orf19.1169   | JID1    | -1.51 | 0.0433488 | orf19.7384   | NOG1      | 1.30 | 0.006118996 |
| orf19.5635   | PGA7    | -1.51 | 0.0324044 | orf19.124    | CIC1      | 1.30 | 0.02930403  |
| orf19.2738   | SUL2    | -1.50 | 0.0325269 | orf19.7050   | NOP15     | 1.28 | 0.02444398  |
| orf19.3548.1 | WH11    | -1.48 | 0.0244884 | orf19.6886   | NOP53     | 1.28 | 0.015819052 |
| orf19.5874   |         | -1.46 | 0.0025957 | orf19.4815   | YTM1      | 1.27 | 0.012794281 |
| orf19.7284   | ASR2    | -1.46 | 0.0281728 | orf19.3962   | HAS1      | 1.27 | 0.005417946 |
| orf19.7209   |         | -1.44 | 0.0132679 | orf19.3547   | PUF6      | 1.26 | 0.00630226  |
| orf19.5140   |         | -1.44 | 0.1381458 | orf19.7411   | OAC1      | 1.25 | 0.026545633 |
| orf19.2372   |         | -1.44 | 0.0155799 | orf19.6828   | RRP1      | 1.24 | 0.024224404 |
| orf19.4802   | FTH1    | -1.43 | 0.0093412 | orf19.6766   | NOP13     | 1.24 | 0.013109667 |
| orf19.5634   | FRP1    | -1.40 | 0.0570601 | orf19.6902   | DBP7      | 1.23 | 0.00755225  |
| orf19.7283   |         | -1.39 | 0.0404269 | orf19.5010   | DIM1      | 1.23 | 0.02428095  |
| orf19.6840   |         | -1.37 | 0.0041963 | orf19.4177   | HIS5      | 1.22 | 0.00017756  |
| orf19.6350   |         | -1.37 | 0.0105301 | orf19.6938   | MEU1      | 1.22 | 0.018970452 |
| orf19.260    | SLD1    | -1.35 | 0.0204582 | orf19.6648   | SDA1      | 1.22 | 0.012067644 |
| orf19.5799   | YJL016W | -1.34 | 0.010889  | orf19.7534   | MIS12     | 1.21 | 0.009126127 |
| orf19.5785   |         | -1.33 | 0.0728571 | orf19.3867   | RPL7      | 1.21 | 0.004818808 |
| orf19.3803   | MNN22   | -1.33 | 0.0227477 | orf19.6724   | FUM12     | 1.21 | 0.022172468 |
| orf19.994    |         | -1.32 | 0.3181908 | orf19.5760   | IHD1      | 1.21 | 0.018460155 |
| orf19.753    | MNT4    | -1.32 | 0.0159037 | CaalfMp14    | NAD4      | 1.19 | 0.02871174  |
| orf19.7362   | SKN1    | -1.31 | 0.0082714 | orf19.1235   | HOM3      | 1.18 | 0.03819877  |
| orf19.4976   |         | -1.31 | 0.0115011 | orf19.5232   | CSI2      | 1.18 | 0.020751953 |

|            |         |       |           |              |         |      |             |
|------------|---------|-------|-----------|--------------|---------|------|-------------|
| orf19.1442 | PLB4.5  | -1.31 | 0.0172995 | orf19.7219   | FTR1    | 1.18 | 0.019428652 |
| orf19.2990 | XOG1    | -1.30 | 0.0227494 | orf19.7077   | ATM1    | 1.17 | 0.017231384 |
| orf19.342  | BMT7    | -1.29 | 0.0023868 | orf19.501    | NOP2    | 1.16 | 0.005681314 |
| orf19.6224 |         | -1.29 | 0.1314861 | orf19.6234   | IPI3    | 1.16 | 0.017129784 |
| orf19.7214 | YBR056W | -1.28 | 0.0058278 | orf19.1822   | UME6    | 1.14 | 0.20687594  |
| orf19.257  |         | -1.28 | 0.0664062 | orf19.7011   | RRP12   | 1.14 | 0.004279594 |
| orf19.6688 |         | -1.27 | 0.1530056 | orf19.6139   | FRE7    | 1.14 | 0.010380449 |
| orf19.2296 |         | -1.26 | 0.0145313 | orf19.756    | SAP7    | 1.14 | 0.001911568 |
| orf19.7106 | VPS70   | -1.26 | 0.0092817 | orf19.1815   | TIF6    | 1.14 | 0.003886314 |
| orf19.7531 |         | -1.25 | 0.0041844 | orf19.1327   | RBT1    | 1.13 | 0.009219825 |
| orf19.4980 | HSP70   | -1.25 | 0.0396918 | orf19.3585   | TRM112  | 1.12 | 0.009019636 |
| orf19.751  |         | -1.24 | 0.0169515 | orf19.7223   | RKM3    | 1.12 | 0.003589797 |
| orf19.6449 |         | -1.23 | 0.010536  | orf19.3099   | TRP4    | 1.11 | 0.002921231 |
| orf19.4842 |         | -1.20 | 0.0476021 | orf19.4856   | LIP3    | 1.11 | 0.012774266 |
| orf19.3828 |         | -1.19 | 0.0175588 | orf19.4861.1 |         | 1.10 | 0.05870672  |
| orf19.4970 |         | -1.19 | 0.0299631 | orf19.5517   |         | 1.10 | 0.023956167 |
| orf19.6021 | IHD2    | -1.18 | 0.0050293 | orf19.5299   | ECM1    | 1.10 | 0.01895491  |
| orf19.6556 |         | -1.18 | 0.045921  | orf19.5905   | YBL028C | 1.10 | 0.030461714 |
| orf19.2227 |         | -1.18 | 0.0173497 | orf19.4587   | HGH1    | 1.09 | 0.007529644 |
| orf19.1632 |         | -1.18 | 0.0041041 | orf19.3276   | PWP2    | 1.09 | 0.006017111 |
| orf19.5549 |         | -1.18 | 0.0291013 | orf19.6236   | NOP6    | 1.09 | 0.022673238 |
| orf19.5348 | TPS3    | -1.16 | 0.0222915 | orf19.3778   | RSA4    | 1.08 | 0.005576024 |
| orf19.2076 | YMR130W | -1.16 | 0.0260101 | orf19.3432   |         | 1.08 | 0.001599076 |
| orf19.3621 |         | -1.16 | 0.0069162 | orf19.7635   | DRS1    | 1.07 | 0.007555083 |
| orf19.2049 |         | -1.16 | 0.065704  | orf19.3540   | MAK5    | 1.06 | 0.007551055 |
| orf19.5532 |         | -1.16 | 0.0243618 | orf19.4479   | NOP9    | 1.06 | 0.011525948 |
| orf19.6078 | POL93   | -1.16 | 0.0228821 | orf19.2185   | NSA1    | 1.05 | 0.026547635 |
| orf19.2886 | CEK1    | -1.16 | 0.0112903 | orf19.1721   | NCE103  | 1.05 | 0.047493838 |
| orf19.7170 |         | -1.16 | 0.0532398 | orf19.5877   | ATF1    | 1.05 | 0.002485415 |
| orf19.3369 | MOH1    | -1.15 | 0.010381  | orf19.6355   | RRB1    | 1.05 | 0.006356484 |
| orf19.4309 | GRP2    | -1.15 | 0.0120535 | orf19.4190   | PAM18   | 1.05 | 0.019046353 |
| orf19.7456 |         | -1.15 | 0.0067742 | orf19.5806   | ALD5    | 1.04 | 0.017240556 |
| orf19.6248 |         | -1.14 | 0.0013986 | orf19.5850   | NOC2    | 1.04 | 0.007723489 |
| orf19.4943 | PSA2    | -1.13 | 0.0141283 | orf19.4093   | PES1    | 1.03 | 0.005957943 |
| orf19.6502 | YDL114W | -1.13 | 0.010798  | orf19.1587   | HGT20   | 1.03 | 0.001681216 |
| orf19.6673 | HEX1    | -1.12 | 0.0061472 | orf19.1566   | UTP21   | 1.03 | 0.014714331 |
| orf19.2768 | AMS1    | -1.11 | 0.0152023 | orf19.4227   |         | 1.03 | 0.13849184  |
| orf19.5258 |         | -1.11 | 0.008178  | orf19.397    | MRPL28  | 1.02 | 0.014112735 |
| orf19.3131 | OYE32   | -1.10 | 0.0021345 | orf19.6696   | TIM9    | 1.02 | 0.012600794 |
| orf19.467  |         | -1.10 | 0.0039142 | orf19.2810   | AAP1    | 1.01 | 0.021970648 |
| orf19.6229 | CAT1    | -1.10 | 0.0351695 | orf19.6014   | RRS1    | 1.01 | 0.008664969 |

|              |           |       |           |            |        |      |             |
|--------------|-----------|-------|-----------|------------|--------|------|-------------|
| orf19.4048   | DES1      | -1.08 | 0.0170478 | orf19.3676 | ABP140 | 1.01 | 0.008292232 |
| orf19.3793   |           | -1.07 | 0.0124268 | orf19.5991 | DBP10  | 1.00 | 0.006500144 |
| orf19.4571   |           | -1.07 | 0.0388716 |            |        |      |             |
| orf19.787.1  |           | -1.06 | 0.0291346 |            |        |      |             |
| orf19.3749   | IFC3/OPT3 | -1.06 | 0.0646478 |            |        |      |             |
| orf19.1227   | ZCF4      | -1.04 | 0.032679  |            |        |      |             |
| orf19.2959.1 |           | -1.04 | 0.0202323 |            |        |      |             |
| orf19.2515   |           | -1.04 | 0.0789039 |            |        |      |             |
| orf19.4612   |           | -1.03 | 0.0077352 |            |        |      |             |
| orf19.6073   | HMX1      | -1.03 | 0.0117392 |            |        |      |             |
| orf19.7310   | MSC1      | -1.03 | 0.0587725 |            |        |      |             |
| orf19.5862   | AFP99     | -1.02 | 0.0137623 |            |        |      |             |
| orf19.2968   |           | -1.02 | 0.0315673 |            |        |      |             |
| orf19.4763   | FUN14     | -1.02 | 0.0505791 |            |        |      |             |
| orf19.1339   | CPY1      | -1.02 | 0.0067258 |            |        |      |             |
| orf19.3282   | BMT3      | -1.02 | 0.0003892 |            |        |      |             |
| orf19.2947   | SNZ1      | -1.02 | 0.009685  |            |        |      |             |
| orf19.5138   | IFA21     | -1.01 | 0.0072066 |            |        |      |             |
| orf19.6008   | YLL032C   | -1.00 | 0.0050815 |            |        |      |             |
| orf19.36.1   |           | -1.00 | 0.0232967 |            |        |      |             |
| orf19.5525   | YMR315W   | -1.00 | 0.0299479 |            |        |      |             |

**Table S3. Primers used in the present study.**

**FP (forward primer), RP (reverse primer)**

| Primer name             | Primer sequence (5' - - 3')                           |
|-------------------------|-------------------------------------------------------|
| <i>CDR6</i> -KpnI       | CGCGAG <u>GGTACC</u> TTGCAAATTCGTAAC TGTGTTAC         |
| <i>CDR6</i> -XhoI-NotI  | CGCGAG <u>GCGGCC</u> GCCTCGAGTTGTTGACTAAAAAGTGTAC     |
| <i>CDR6</i> -SacII-NotI | CGCGAG <u>GCGGCCG</u> CCCGCGCATTAGAATGTGTATATATGTATTA |
| <i>CDR6</i> -SacI       | CGCGAG <u>GAGCTC</u> AAGGGCTTAAAGTTAAAG               |
| <i>CDR6</i> -Rev-KpnI   | CGCGAG <u>GGTACC</u> GAACTTTTGTACCCAAGCTAATGG         |

|                       |                                                            |
|-----------------------|------------------------------------------------------------|
| <i>CDR6</i> -Rev-XhoI | CGCGA <u><b>CTCGAG</b></u> CGTCAGAGTTAAATGGTTTTAG          |
| <i>CDR6</i> -RT-FP    | GGCAACCAATGTTTTGAGTACCTTTG                                 |
| <i>CDR6</i> -RT-RP    | GTTTCATATTGTAGTAGCTCAATAC                                  |
| <i>ACT1</i> -RT-FP    | GGGTAGGGTGGGAAAACCTTCA                                     |
| <i>ACT1</i> -RT-RP    | TTGAAACCACTGCCGACAGA                                       |
| <i>KNS1</i> -RT-FP    | AGAAAAAGCTACCTCCAGCTCGTA                                   |
| <i>KNS1</i> -RT-RP    | GATGAGGTATCACATTGGTCCGTAT                                  |
| <i>HSP70</i> -RT-FP   | TTGTGTTGCTCATTTTGCCAAT                                     |
| <i>HSP70</i> -RT-RP   | CAGTGTTTGCTGGGTTTATAGC                                     |
| 4531FP                | ggggacaagttgtacaaaaagcaggctgATGAAGGAAGGTGCTAGTGTATTAAGTATT |
| 4531RP                | ggggaccactttgtacaagaagctgggtcAAACCATTAACTCTGACGTAAATTGATAA |

**Table S4. List of strains used in the present study.**

| <b>Strain</b> | <b>Genotype/description</b>                | <b>Source/reference</b> |
|---------------|--------------------------------------------|-------------------------|
| WT (SC5314)   | Wild-type strain                           | (1)                     |
| NKKY100       | SC5314 derivative,<br>cdr6Δ::FLP_SAT1/CDR6 | The present study       |
| NKKY1001      | NKKY100 derivative,<br>cdr6Δ::FRT/CDR6     | The present study       |
| NKKY101       | NKKY1001 derivative,                       | The present study       |

|          |                                                                                           |                   |
|----------|-------------------------------------------------------------------------------------------|-------------------|
|          | cdr6Δ::FRT/ cdr6Δ::FLP_SAT1                                                               |                   |
| NKKY1011 | NKKY101 derivative,<br>cdr6Δ::FRT/ cdr6Δ::FRT                                             | The present study |
| NKKY102  | NKKY1011 derivative,<br>cdr6Δ::FRT/cdr6Δ::FRT::CDR6/FLPSAT1                               | The present study |
| NKKY103  | SC5314 cells harboring extra copy of<br><i>CDR6</i> ,integrated at <i>RPS1</i> locus      | The present study |
| CA-CDR6  | SC5314 cells harboring extra copy of GFP-<br><i>CDR6</i> ,integrated at <i>RPS1</i> locus | The present study |

## Reference

1. **Gillum AM, Tsay EY, Kirsch DR.** 1984. Isolation of the *Candida albicans* gene for orotidine-5'-phosphate decarboxylase by complementation of *S. cerevisiae* *ura3* and *E. coli* *pyrF* mutations. *Mol Gen Genet* **198**:179–182.
